# Supplementary material for: Distribution of ermB, ermF, tet(W), and tet(M) Resistance Genes in the Vaginal Ecosystem of Women during Pregnancy and Puerperium
Source: MDPI journal article supplement (doi:10.3390/pathogens10121546), 2021-11-26

# SUPPLEMENTARY MATERIAL

## **Distribution of *ermB*, *ermF*, *tet(W)*, and *tet(M)* resistance genes in the vaginal ecosystem of women during pregnancy and puerperium**

Marco Severgnini<sup>1^</sup>, Tania Camboni<sup>1^</sup>, Camilla Ceccarani<sup>1</sup>, Sara Morselli<sup>2</sup>, Alessia Cantiani<sup>2</sup>, Sara Zagonari<sup>3</sup>, Giulia Patuelli<sup>3</sup>, Maria Federica Pedna<sup>4</sup>, Vittorio Sambri<sup>2,4</sup>, Claudio Foschi<sup>2\*</sup>, Clarissa Consolandi<sup>1</sup>, Antonella Marangoni<sup>2</sup>

<sup>1</sup>Institute of Biomedical Technologies – National Research Council, Segrate, Milan, Italy

<sup>2</sup>Microbiology, DIMES, University of Bologna, Bologna, Italy

<sup>3</sup>Family Advisory Health Centres, Ravenna, Italy

<sup>4</sup>Unit of Microbiology, Greater Romagna Hub Laboratory, Pievesestina di Cesena, Italy

<sup>^</sup>Marco Severgnini and Tania Camboni equally contributed to this work

<sup>\*</sup>Corresponding author: Claudio Foschi (claudio.foschi2@unibo.it)

## Supplementary tables

|                                                                                                                |   |
|----------------------------------------------------------------------------------------------------------------|---|
| Table S1. Vaginal status, stratified by the gestational age.....                                               | 3 |
| Table S2. Prevalence of resistance genes.....                                                                  | 4 |
| Table S3. Distribution of macrolide and tetracycline resistance genes, stratified for the gestational age..... | 5 |
| Table S4. Bacterial genera statistically different ( $p<0.05$ , Mann-Whitney U-test) between samples.....      | 6 |
| Table S5. List of primers and PCR conditions used for the detection of resistance genes.....                   | 8 |

## Supplementary figures

|                                                                                    |    |
|------------------------------------------------------------------------------------|----|
| Figure S1. Alpha diversity boxplots for the four resistance genes combination..... | 9  |
| Figure S2. All statistically significant survival curves.....                      | 10 |

**Table S1. Vaginal status, stratified by the gestational age.**

| <b>Time point</b>         | <b>H<br/>(n=142)</b> | <b>I<br/>(n=51)</b> | <b>BV<br/>(n=35)</b> |
|---------------------------|----------------------|---------------------|----------------------|
| 1 <sup>st</sup> trimester | 33 (23.2%)           | 26 (51.0%)          | 13 (37.1%)           |
| 2 <sup>nd</sup> trimester | 47 (33.1%)           | 10 (19.6%)          | 6 (17.1%)            |
| 3 <sup>rd</sup> trimester | 52 (36.6%)           | 7 (13.7%)           | 4 (11.4%)            |
| puerperium                | 10 (7.1%)            | 8 (15.7%)           | 12 (34.3%)           |

**Table S2. Prevalence of resistance genes.** Prevalence for all cases and those showing a BV vaginal status is shown.

| Resistance genes                                          | n° of cases<br>(tot=228) | BV cases<br>(n=35) |
|-----------------------------------------------------------|--------------------------|--------------------|
| None                                                      | 39 (17.1%)               | 1 (2.8%)           |
| <i>tet(M)</i>                                             | 51 (22.3%)               | 6 (17.1%)          |
| <i>ermB</i>                                               | 10 (4.4%)                | 1 (2.8%)           |
| <i>ermF</i>                                               | 0 (0.0%)                 | 0 (0.0%)           |
| <i>tet(W)</i>                                             | 1 (0.4%)                 | 0 (0.0%)           |
| <i>ermB</i> + <i>tet(M)</i>                               | 55 (24.1%)               | 7 (20.0%)          |
| <i>ermF</i> + <i>tet(M)</i>                               | 8 (3.5%)                 | 2 (5.7%)           |
| <i>tet(M)</i> + <i>tet(W)</i>                             | 1 (0.4%)                 | 0 (0.0%)           |
| <i>ermB</i> + <i>ermF</i>                                 | 1 (0.4%)                 | 1 (2.8%)           |
| <i>ermB</i> + <i>tet(W)</i>                               | 0 (0.0%)                 | 0 (0.0%)           |
| <i>ermF</i> + <i>tet(W)</i>                               | 1 (0.4%)                 | 0 (0.0%)           |
| <i>ermB</i> + <i>ermF</i> + <i>tet(M)</i>                 | 31 (13.6%)               | 10 (28.6%)         |
| <i>ermB</i> + <i>tet(M)</i> + <i>tet(W)</i>               | 13 (5.7%)                | 4 (11.4%)          |
| <i>ermB</i> + <i>ermF</i> + <i>tet(W)</i>                 | 1 (0.4%)                 | 0 (0.0%)           |
| <i>ermF</i> + <i>tet(M)</i> + <i>tet(W)</i>               | 1 (0.4%)                 | 1 (2.8%)           |
| <i>ermB</i> + <i>ermF</i> + <i>tet(M)</i> + <i>tet(W)</i> | 15 (6.6%)                | 2 (5.7%)           |

**Table S3. Distribution of macrolide and tetracycline resistance genes, stratified for the gestational age.**

| <b>Time point</b>         | <b><i>ermB</i><br/>(n=126)</b> | <b><i>ermF</i><br/>(n=58)</b> | <b><i>tet(M)</i><br/>(n=175)</b> | <b><i>tet(W)</i><br/>(n=33)</b> |
|---------------------------|--------------------------------|-------------------------------|----------------------------------|---------------------------------|
| 1 <sup>st</sup> trimester | 44 (34.9%)                     | 23 (39.6%)                    | 55 (31.4%)                       | 11 (33.4%)                      |
| 2 <sup>nd</sup> trimester | 33 (26.2%)                     | 11 (19.0%)                    | 46 (26.3%)                       | 8 (24.2%)                       |
| 3 <sup>rd</sup> trimester | 27 (21.4%)                     | 13 (22.4%)                    | 47 (26.8%)                       | 8 (24.2%)                       |
| Puerperium                | 22 (17.5%)                     | 11 (19.0%)                    | 27 (15.4%)                       | 6 (18.2%)                       |

**Table S4. Bacterial genera statistically different ( $p<0.05$ , Mann-Whitney U-test) between samples.** Presence and absence of each resistance gene, stratified according to women's vaginal status, is shown. For each gene and category, the number of samples is indicated.

| Gene          | Status | N+ <sup>a</sup> | N- <sup>b</sup> | Genus                  | Avg. rel. ab (%)  |                   | Direction <sup>c</sup> |
|---------------|--------|-----------------|-----------------|------------------------|-------------------|-------------------|------------------------|
|               |        |                 |                 |                        | Gene positive [+] | Gene negative [-] |                        |
| <i>ermB</i>   | BV     | 26              | 9               | <i>Prevotella</i>      | 13.0              | 2.6               | ↑                      |
|               |        |                 |                 | <i>Megasphaera</i>     | 7.9               | 1.3               | ↑                      |
|               |        |                 |                 | <i>Sneathia</i>        | 5.5               | 0.0               | ↑                      |
|               |        |                 |                 | <i>Prevotella 7</i>    | 0.0               | 3.4               | ↓                      |
|               |        |                 |                 | <i>DNF00809</i>        | 1.0               | 0.1               | ↑                      |
|               | I      | 30              | 21              | <i>Prevotella</i>      | 6.4               | 2.5               | ↑                      |
|               | H      | 70              | 72              | <i>Prevotella</i>      | 1.5               | 0.1               | ↑                      |
|               |        |                 |                 | <i>Atopobium</i>       | 2.3               | 0.1               | ↑                      |
|               |        |                 |                 | <i>Streptococcus</i>   | 0.1               | 0.3               | ↓                      |
| <i>ermF</i>   | BV     | 16              | 19              | <i>Sneathia</i>        | 6.2               | 2.3               | ↑                      |
|               |        |                 |                 | <i>Ureaplasma</i>      | 1.0               | 0.1               | ↑                      |
|               |        |                 |                 | <i>Prevotella 6</i>    | 3.3               | 0.6               | ↑                      |
|               |        |                 |                 | <i>DNF00809</i>        | 1.3               | 0.3               | ↑                      |
|               |        |                 |                 | <i>Fastidiosipila</i>  | 1.1               | 0.3               | ↑                      |
|               | I      | 15              | 36              | <i>Lactobacillus</i>   | 55.5              | 79.2              | ↓                      |
|               |        |                 |                 | <i>Prevotella</i>      | 9.0               | 3.0               | ↑                      |
|               |        |                 |                 | <i>Atopobium</i>       | 8.1               | 2.0               | ↑                      |
|               |        |                 |                 | <i>Streptococcus</i>   | 4.9               | 0.6               | ↑                      |
|               | H      | 27              | 115             | <i>Lactobacillus</i>   | 74.3              | 84.8              | ↓                      |
|               |        |                 |                 | <i>Bifidobacterium</i> | 5.2               | 3.1               | ↑                      |
|               |        |                 |                 | <i>Prevotella</i>      | 2.8               | 0.3               | ↑                      |
|               |        |                 |                 | <i>Atopobium</i>       | 1.3               | 1.1               | ↑                      |
|               |        |                 |                 |                        |                   |                   |                        |
| <i>tet(M)</i> | BV     | 32              | 3               | <i>Gardnerella</i>     | 18.13             | 76.18             | ↓                      |
|               |        |                 |                 | <i>Dialister</i>       | 1.45              | 0.02              | ↑                      |
|               |        |                 |                 | <i>Prevotella 6</i>    | 2.02              | 0.00              | ↑                      |
|               | I      | 42              | 9               | --                     | --                | --                | --                     |
|               | H      | 101             | 41              | <i>Lactobacillus</i>   | 79.87             | 90.06             | ↓                      |
|               |        |                 |                 | <i>Bifidobacterium</i> | 4.89              | 0.00              | ↑                      |
|               |        |                 |                 | <i>Prevotella</i>      | 1.12              | 0.03              | ↑                      |
|               |        |                 |                 | <i>Atopobium</i>       | 1.64              | 0.00              | ↑                      |
| <i>tet(W)</i> | BV     | 7               | 28              | <i>Megasphaera</i>     | 13.95             | 4.30              | ↑                      |
|               |        |                 |                 | <i>Dialister</i>       | 1.99              | 1.17              | ↑                      |
|               |        |                 |                 | <i>Prevotella 6</i>    | 4.51              | 1.18              | ↑                      |
|               |        |                 |                 | <i>Aerococcus</i>      | 0.33              | 1.72              | ↓                      |
|               |        |                 |                 | <i>Fastidiosipila</i>  | 1.29              | 0.48              | ↑                      |
|               | I      | 6               | 45              | <i>Lactobacillus</i>   | 51.74             | 74.93             | ↓                      |
|               |        |                 |                 | <i>Bifidobacterium</i> | 9.91              | 2.76              | ↑                      |
|               | H      | 20              | 122             | <i>Lactobacillus</i>   | 72.33             | 84.53             | ↓                      |
|               |        |                 |                 | <i>Bifidobacterium</i> | 4.96              | 3.24              | ↑                      |
|               |        |                 |                 | <i>Prevotella</i>      | 3.21              | 0.41              | ↑                      |
|               |        |                 |                 | <i>Atopobium</i>       | 0.49              | 1.28              | ↓                      |
|               |        |                 |                 | <i>Anaerococcus</i>    | 1.30              | 0.08              | ↑                      |

<sup>a</sup> Number of samples positive to each resistance gene per each vaginal status

<sup>b</sup> Number of samples negative to each resistance gene per each vaginal status

◦ ↑ indicates an increase in gene positive samples with respect to gene negative ones. ↓ indicates the opposite

**Table S5. List of primers and PCR conditions used for the detection of resistance genes.**

| Gene                       | Primers                                                          | PCR conditions                                                                                  | Amplicon size | Reference                    |
|----------------------------|------------------------------------------------------------------|-------------------------------------------------------------------------------------------------|---------------|------------------------------|
| <b><i>ermB</i></b>         | 5'-GAAAAGGTACTCAACCAAATA-3'<br>5'-AGTAACGGTACTTAAATTGTTTAC-3'    | 95°C for 10 min; 35 cycles of 94°C for 1 min, 54°C for 1 min and 72°C for 1 min; 72°C for 7 min | 639 bp        | Milanovic, 2017 <sup>a</sup> |
| <b><i>ermF</i></b>         | 5'-CGGGTCAGCCTTTACTATTG-3'<br>5'-GGACCTACCTCATAGACAAG-3'         | 95°C for 10 min; 35 cycles of 94°C for 1 min, 48°C for 1 min and 72°C for 1 min; 72°C for 7 min | 466 bp        | Sirichoat, 2020 <sup>b</sup> |
| <b><i>tet(M)</i></b>       | 5'-ACCCGTATACTATTTTCATGCACT-3'<br>5'-CCTTCCATAACCGCATTTTG-3'     | 95°C for 10 min; 35 cycles of 94°C for 1 min, 48°C for 1 min and 72°C for 2 min; 72°C for 7 min | 1115 bp       | Milanovic, 2017 <sup>a</sup> |
| <b><i>tet(W)</i></b>       | 5'-GAGAGCCTGCTATATGCCAGC-3'<br>5'-GGGCGTATCCACAATGTTAAC-3'       | 95°C for 10 min; 35 cycles of 94°C for 1 min, 62°C for 1 min and 72°C for 1 min; 72°C for 7 min | 168 bp        | Milanovic, 2017 <sup>a</sup> |
| <b><i>tet(M)-tn916</i></b> | 5'-TACTACCGGTGAACCTGTTTGCCA-3'<br>5'-TTTAGCCAGCGGTATCAACGAAGC-3' | 95°C for 10 min; 35 cycles of 94°C for 1 min, 55°C for 1 min and 72°C for 1 min; 72°C for 7 min | 472 bp        | Jeters, 2009 <sup>c</sup>    |

a Milanović V., Osimani A., Aquilanti L., et al. (2017). Occurrence of antibiotic resistance genes in the fecal DNA of healthy omnivores, ovo-lacto vegetarians and vegans. *Mol Nutr Food Res*, 61(9).

b Sirichoat A., Flórez A.B., Vázquez Let al. (2020). Antibiotic susceptibility profiles of lactic acid bacteria from the human vagina and genetic basis of acquired resistances. *Int J Mol Sci*, 21(7):2594

c Jeters R. T., Rivera A. J., Boucek L.M., et al. (2009). Antibiotic resistance genes in the vaginal microbiota of primates not normally exposed to antibiotics. *Microb Drug Resist*, 15(4):309-315



**Figure S1. Alpha diversity boxplots for the four resistance genes combination.** Boxplot of the alpha-diversities (Faith's phylogenetic diversity metric) of samples grouped according to the combination of four resistance genes tested. Red lines represent median values, whereas blue ones represent means; yellow dots are the values for the single sample in each category; only combinations with >1 sample per group were considered.

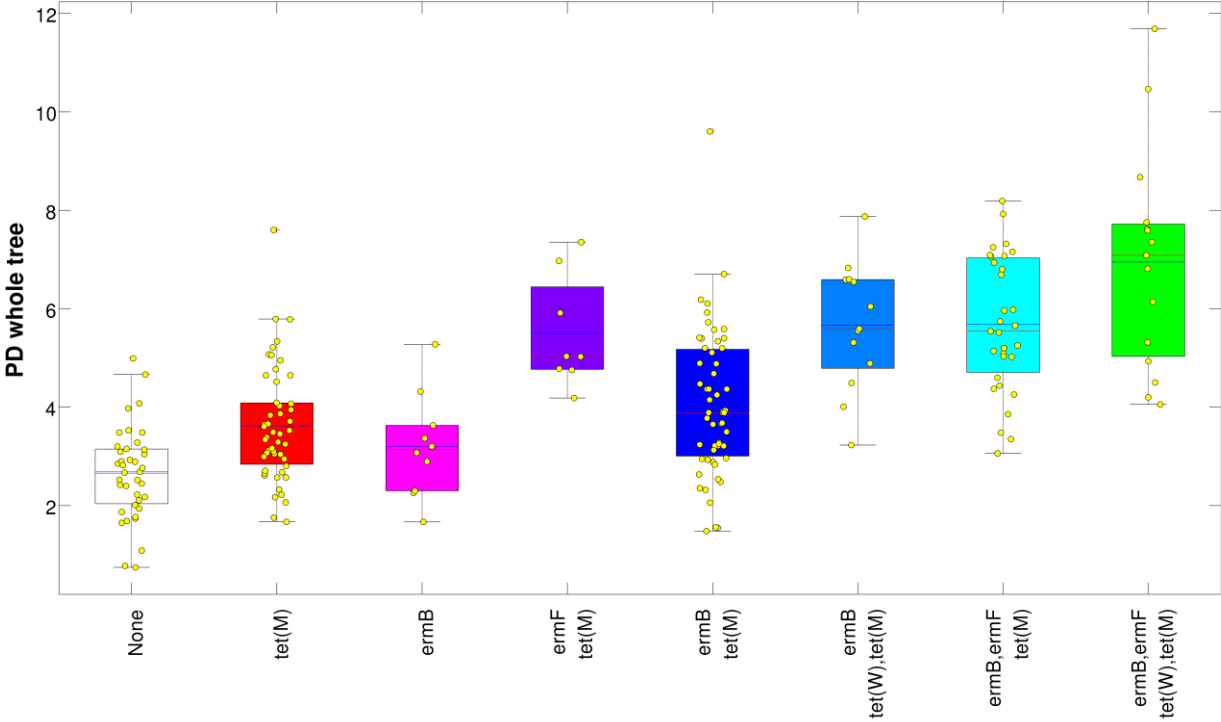

**Figure S2. All statistically significant survival curves.** For any combination of genus-resistance gene, statistically significant differences (log-rank  $p$ -value  $< 0.05$ ) are shown. For each genus-gene, the lowest abundance threshold for which the test was significant is reported.

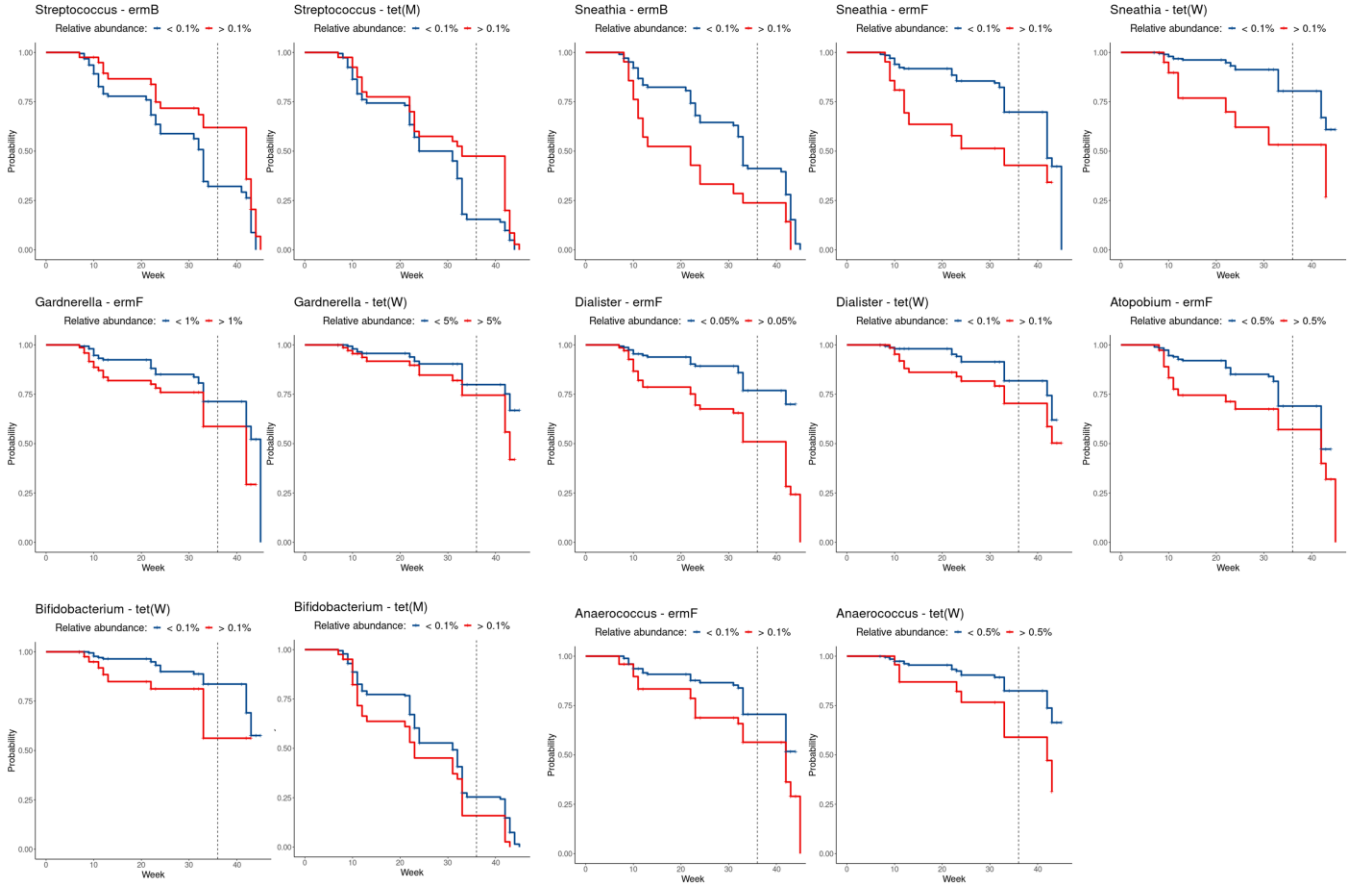

Supplement: s1 [file s1]
